# Supplementary material
Source: PubMed Central journal article supplement (PMC6798803)
Supplement: Supp_Fig3.pdf [file Supp_Fig3.pdf]

**A**

| # of Anatomical Features | Accuracy | Sensitivity | Specificity |
|--------------------------|----------|-------------|-------------|
| 397                      | 0.47     | 0.39        | 0.55        |
| 181                      | 0.56     | 0.50        | 0.62        |
| 99                       | 0.60     | 0.54        | 0.66        |
| 75                       | 0.62     | 0.57        | 0.68        |
| 60                       | 0.65     | 0.54        | 0.74        |
| 48                       | 0.66     | 0.59        | 0.72        |
| 38                       | 0.67     | 0.57        | 0.77        |
| 30                       | 0.67     | 0.57        | 0.77        |
| 24                       | 0.69     | 0.61        | 0.77        |
| 19                       | 0.70     | 0.61        | 0.79        |
| 15                       | 0.68     | 0.61        | 0.74        |
| 12                       | 0.68     | 0.61        | 0.74        |
| 10                       | 0.67     | 0.59        | 0.74        |
| 8                        | 0.61     | 0.59        | 0.64        |
| 6                        | 0.65     | 0.59        | 0.70        |
| 5                        | 0.67     | 0.63        | 0.70        |
| 4                        | 0.67     | 0.70        | 0.64        |
| 3                        | 0.70     | 0.74        | 0.66        |

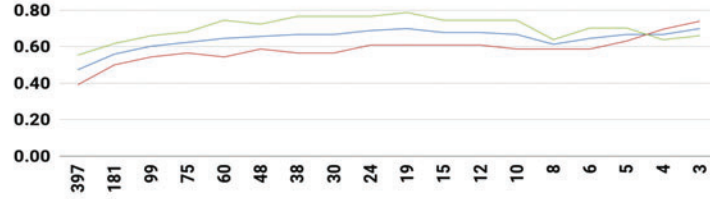**B**

| # of DTI Features | Accuracy | Sensitivity | Specificity |
|-------------------|----------|-------------|-------------|
| 192               | 0.48     | 0.37        | 0.60        |
| 70                | 0.59     | 0.48        | 0.70        |
| 48                | 0.66     | 0.57        | 0.74        |
| 37                | 0.63     | 0.57        | 0.70        |
| 30                | 0.67     | 0.63        | 0.70        |
| 24                | 0.66     | 0.61        | 0.70        |
| 19                | 0.68     | 0.63        | 0.72        |
| 15                | 0.66     | 0.61        | 0.70        |
| 12                | 0.65     | 0.61        | 0.68        |
| 10                | 0.65     | 0.61        | 0.68        |
| 8                 | 0.67     | 0.65        | 0.68        |
| 6                 | 0.67     | 0.65        | 0.68        |
| 5                 | 0.68     | 0.67        | 0.68        |
| 4                 | 0.70     | 0.70        | 0.70        |
| 3                 | 0.71     | 0.70        | 0.72        |

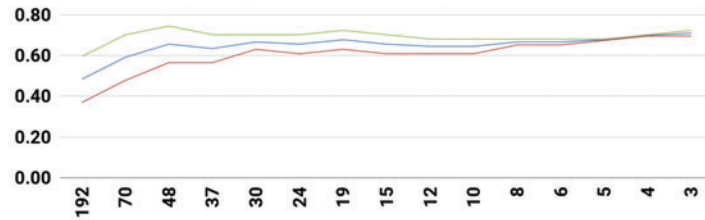**C**

| # of fcMRI Variables | Accuracy | Sensitivity | Specificity |
|----------------------|----------|-------------|-------------|
| 8411                 | 0.78     | 0.81        | 0.76        |
| 5403                 | 0.85     | 0.87        | 0.83        |
| 3858                 | 0.85     | 0.83        | 0.87        |
| 2682                 | 0.88     | 0.87        | 0.89        |
| 2049                 | 0.89     | 0.89        | 0.89        |
| 1564                 | 0.90     | 0.94        | 0.87        |
| 1263                 | 0.89     | 0.91        | 0.87        |
| 1034                 | 0.89     | 0.87        | 0.91        |
| 827                  | 0.88     | 0.91        | 0.85        |
| 662                  | 0.89     | 0.91        | 0.87        |
| 530                  | 0.90     | 0.91        | 0.89        |
| 424                  | 0.94     | 0.96        | 0.91        |
| 339                  | 0.86     | 0.91        | 0.81        |
| 271                  | 0.87     | 0.91        | 0.83        |
| 217                  | 0.90     | 0.96        | 0.85        |
| 174                  | 0.89     | 0.93        | 0.85        |
| 139                  | 0.86     | 0.91        | 0.81        |
| 111                  | 0.89     | 0.96        | 0.83        |
| 89                   | 0.88     | 0.96        | 0.81        |
| 71                   | 0.88     | 0.93        | 0.83        |
| 57                   | 0.88     | 0.91        | 0.85        |
| 46                   | 0.90     | 0.98        | 0.83        |
| 37                   | 0.88     | 0.93        | 0.83        |
| 30                   | 0.88     | 0.96        | 0.81        |
| 24                   | 0.88     | 0.96        | 0.81        |
| 19                   | 0.88     | 0.96        | 0.81        |
| 15                   | 0.86     | 0.89        | 0.83        |
| 12                   | 0.87     | 0.91        | 0.83        |
| 10                   | 0.82     | 0.80        | 0.83        |
| 8                    | 0.80     | 0.78        | 0.81        |
| 6                    | 0.81     | 0.76        | 0.85        |
| 5                    | 0.80     | 0.74        | 0.85        |
| 4                    | 0.81     | 0.74        | 0.87        |
| 3                    | 0.82     | 0.76        | 0.87        |

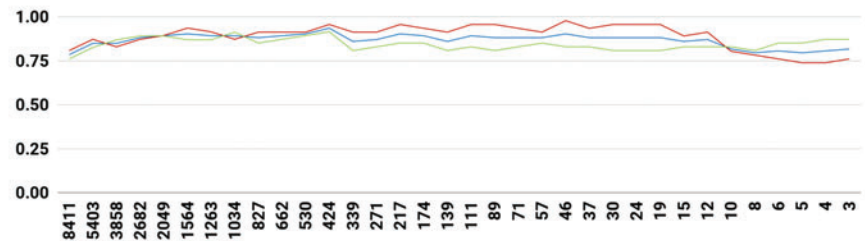

— Accuracy  
— Sensitivity  
— Specificity

**SUPPLEMENTARY FIG. S3.** Accuracy, sensitivity, and specificity rates for each CRF dimension reduction by modality [aMRI (A), DWI (B), fcMRI (C)]. Highlighted blue rows show the number of variables reaching highest accuracy in each modality. CRF, conditional random forest.
