# Supplementary material
Source: PubMed Central journal article supplement (PMC6798803)
Supplement: Supp_Fig4.pdf [file Supp_Fig4.pdf]

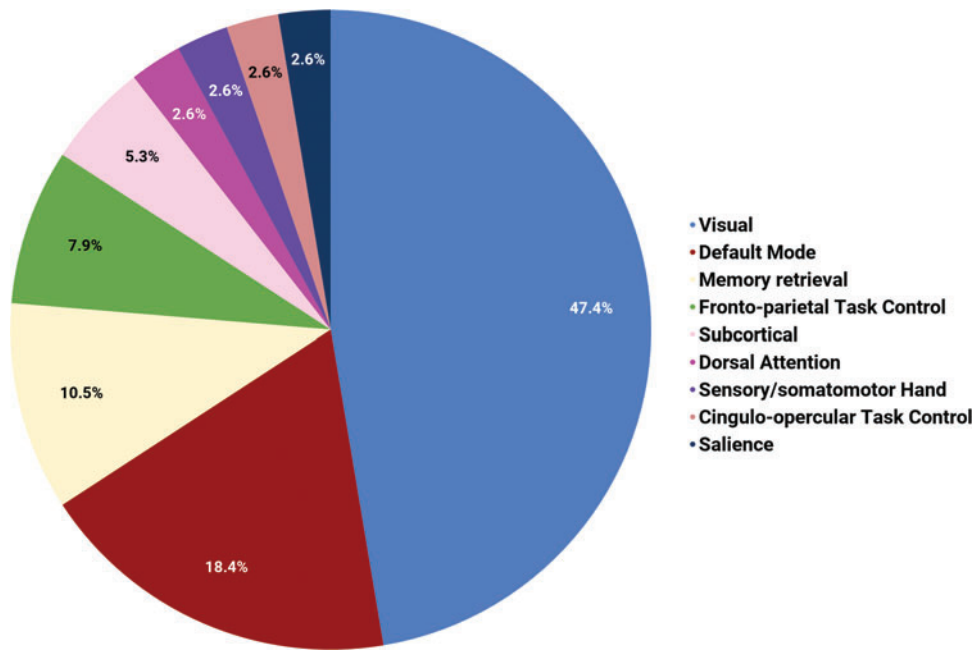

**SUPPLEMENTARY FIG. S4.** Pie chart showing ROI participations by functional network for the top 19 fcMRI variables in analysis 2. ROI, region of interest.
