# Supplementary material
Source: PubMed Central journal article supplement (PMC6798803)
Supplement: Supp_Fig5.pdf [file Supp_Fig5.pdf]

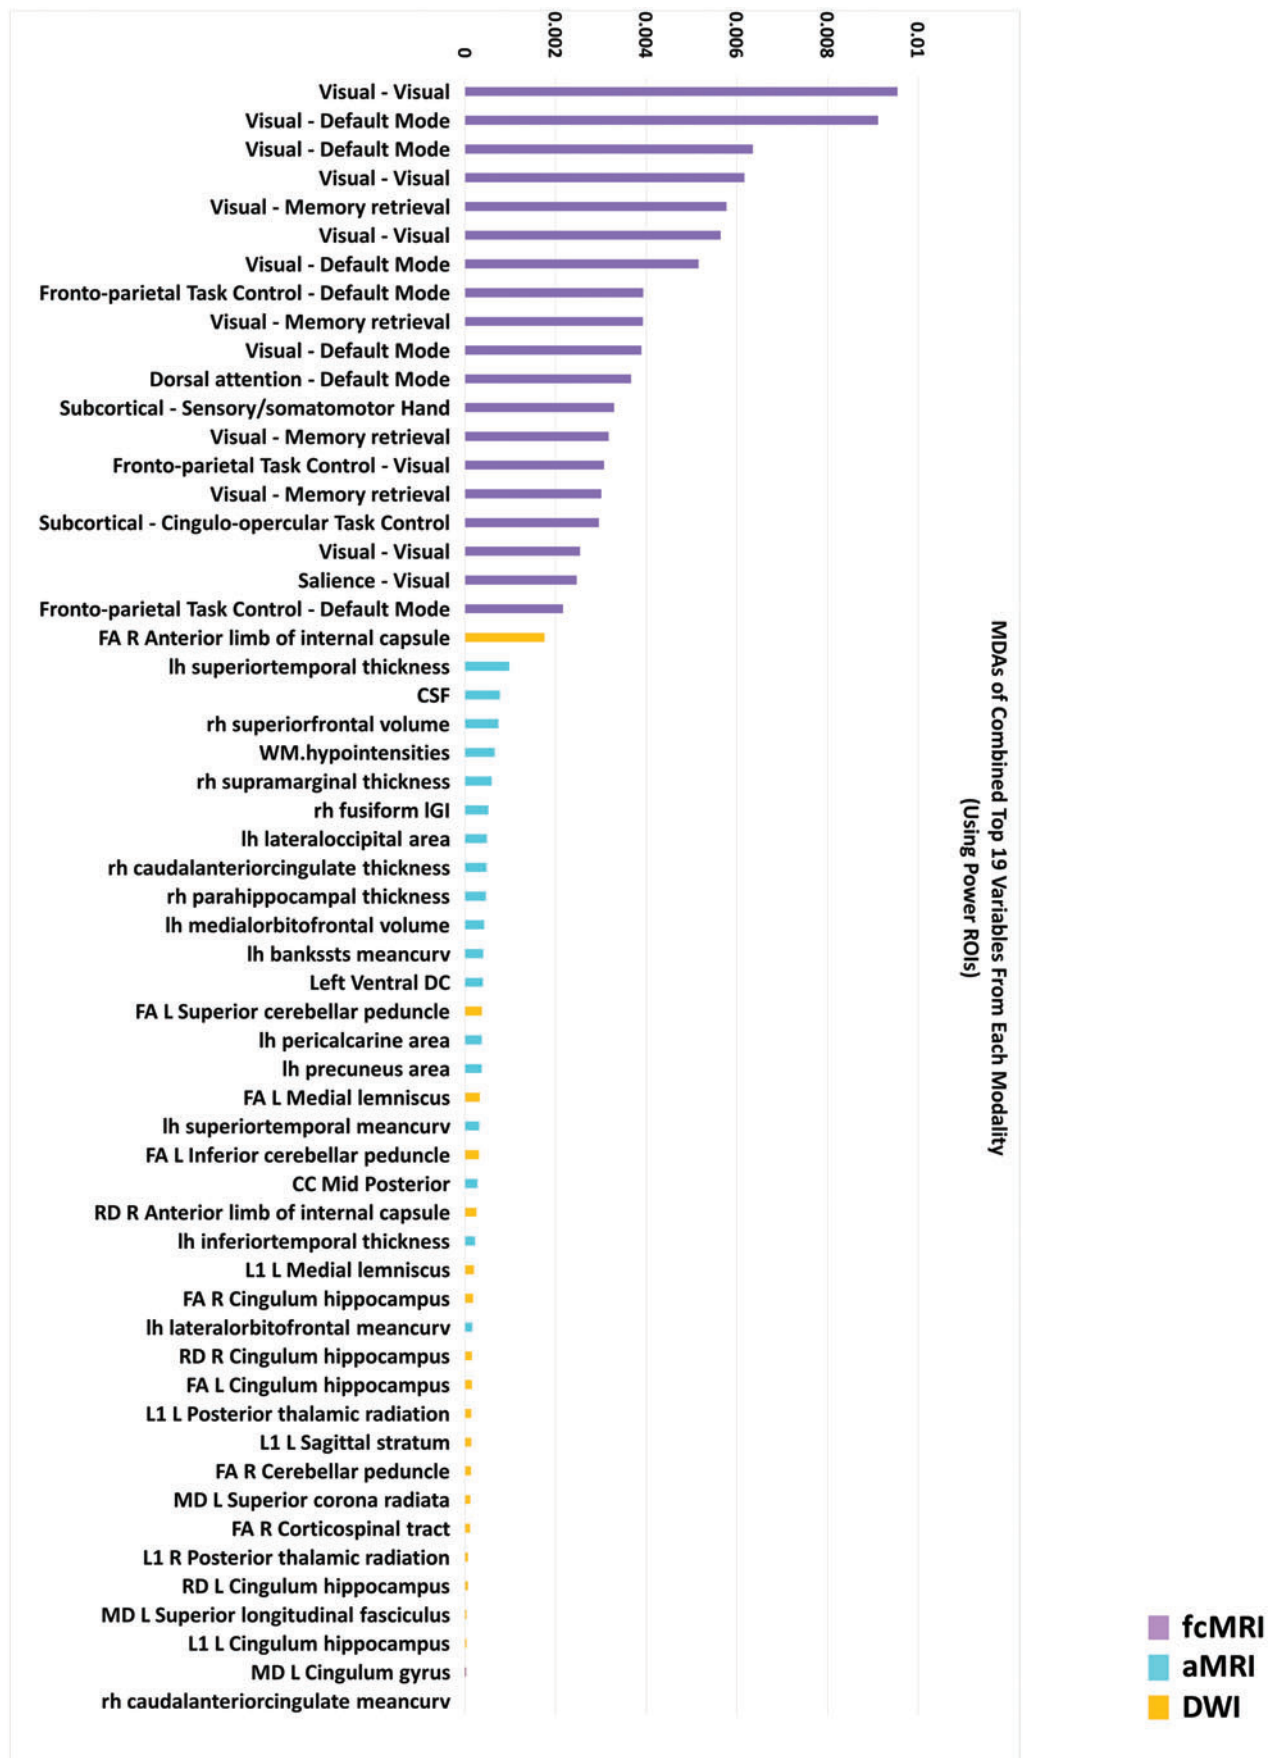

**SUPPLEMENTARY FIG. S5.** MDAs of the combined top 19 variables from each modality (combined top 57 variables) in analysis 2.
