# Supplementary material
Source: PubMed Central journal article supplement (PMC6798803)
Supplement: Supp_Fig8.pdf [file Supp_Fig8.pdf]

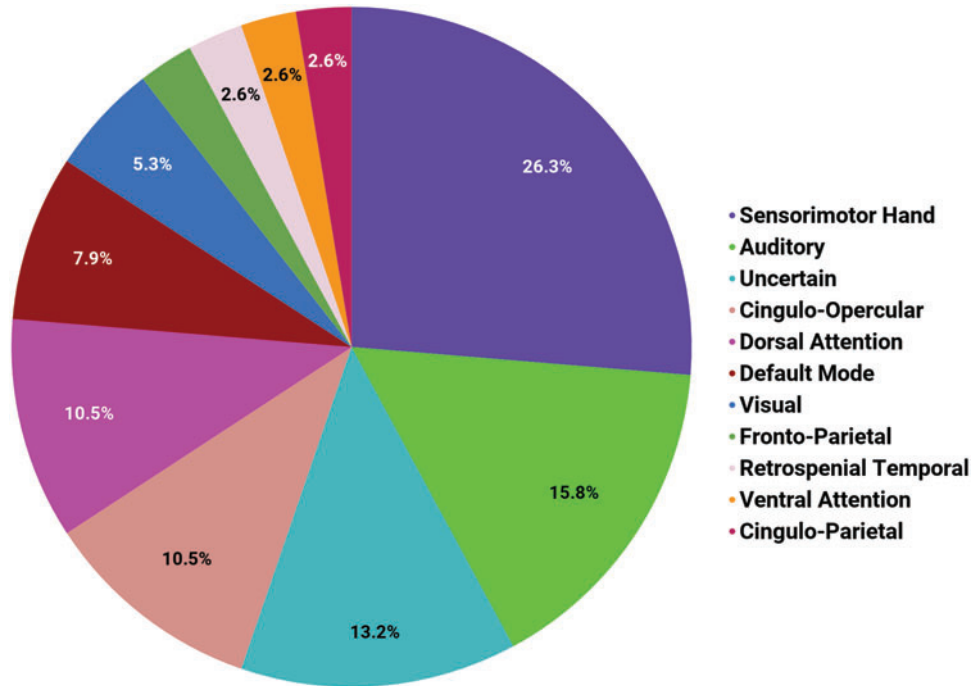

**SUPPLEMENTARY FIG. S8.** Pie chart showing the percentage of ROI participations by brain networks for the top 19 fcMRI variables in analysis 3b (using Harvard-Oxford ROIs).
