# Supplementary material
Source: PubMed Central journal article supplement (PMC6798803)
Supplement: Supp_Figs1-2.pdf [file Supp_Figs1-2.pdf]

# Supplementary Data

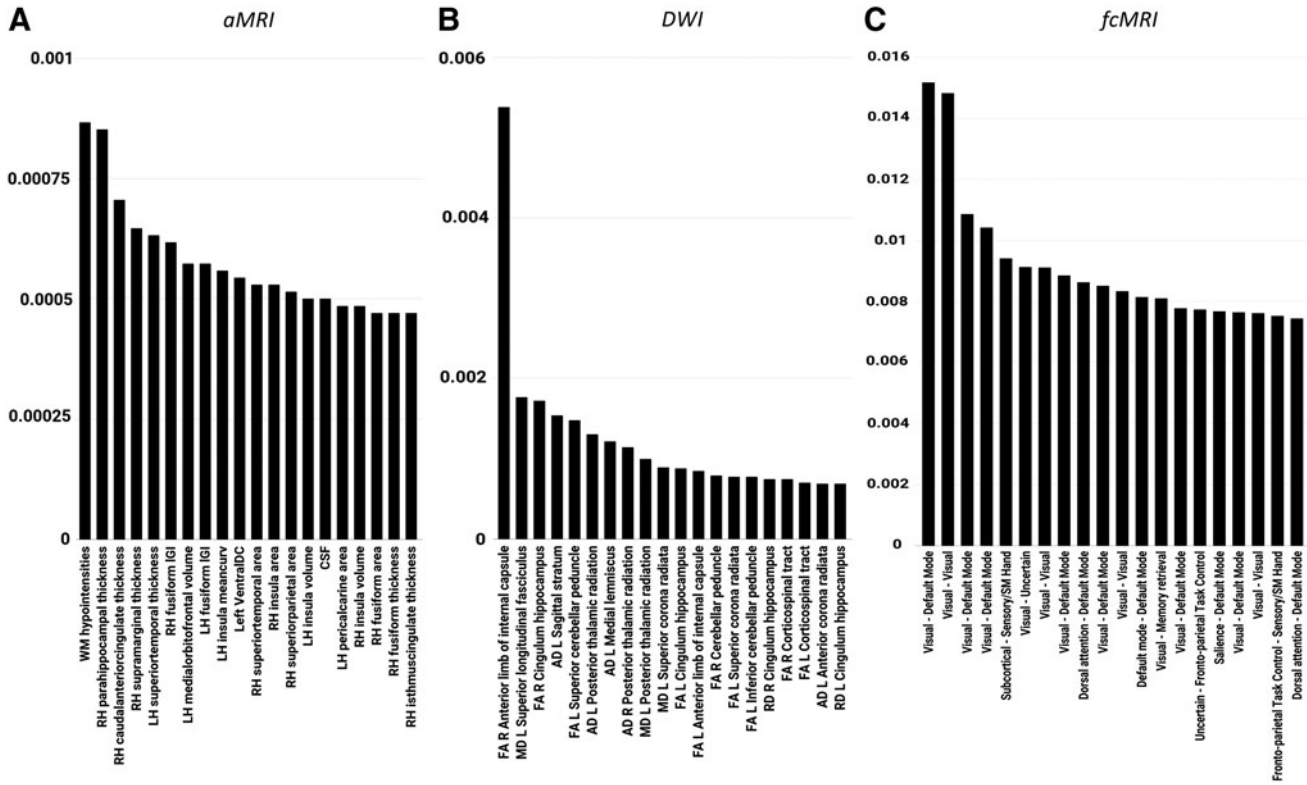

**SUPPLEMENTARY FIG. S1.** MDAs of the top variables from each modality in analysis 1. For visibility, only the top 20 features from each modality are shown. (A) aMRI; (B) DWI; (C) fcMRI. aMRI, anatomical magnetic resonance imaging; DWI, diffusion weighted imaging; fcMRI, functional connectivity MRI; LH left hemisphere; MDA, mean decrease in accuracy; RH, right hemisphere; WM, white matter.

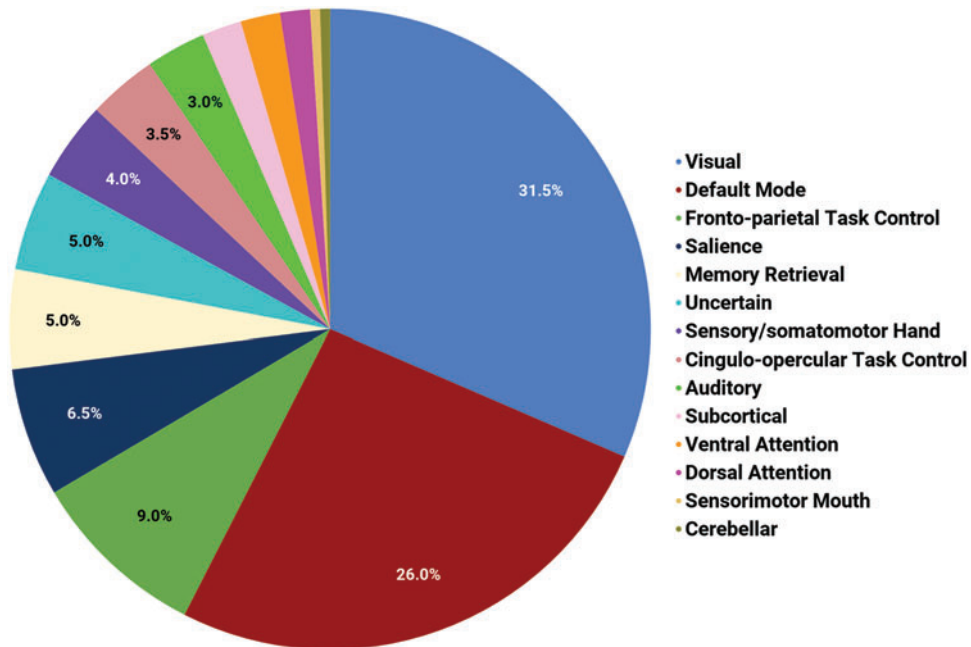

**SUPPLEMENTARY FIG. S2.** Percentage of participations in the top 100 fcMRI variables by functional network (using network assignments from the study by Power et al., 2011).

### **Supplementary Reference**

Power JD, Cohen AL, Nelson SM, Wig GS, Barnes KA, Church JA, et al. 2011. Functional network organization of the human brain. *Neuron* 72:665–678.
