# Supplementary material
Source: PubMed Central journal article supplement (PMC6798803)
Supplement: Supp_Figs6-7.pdf [file Supp_Figs6-7.pdf]

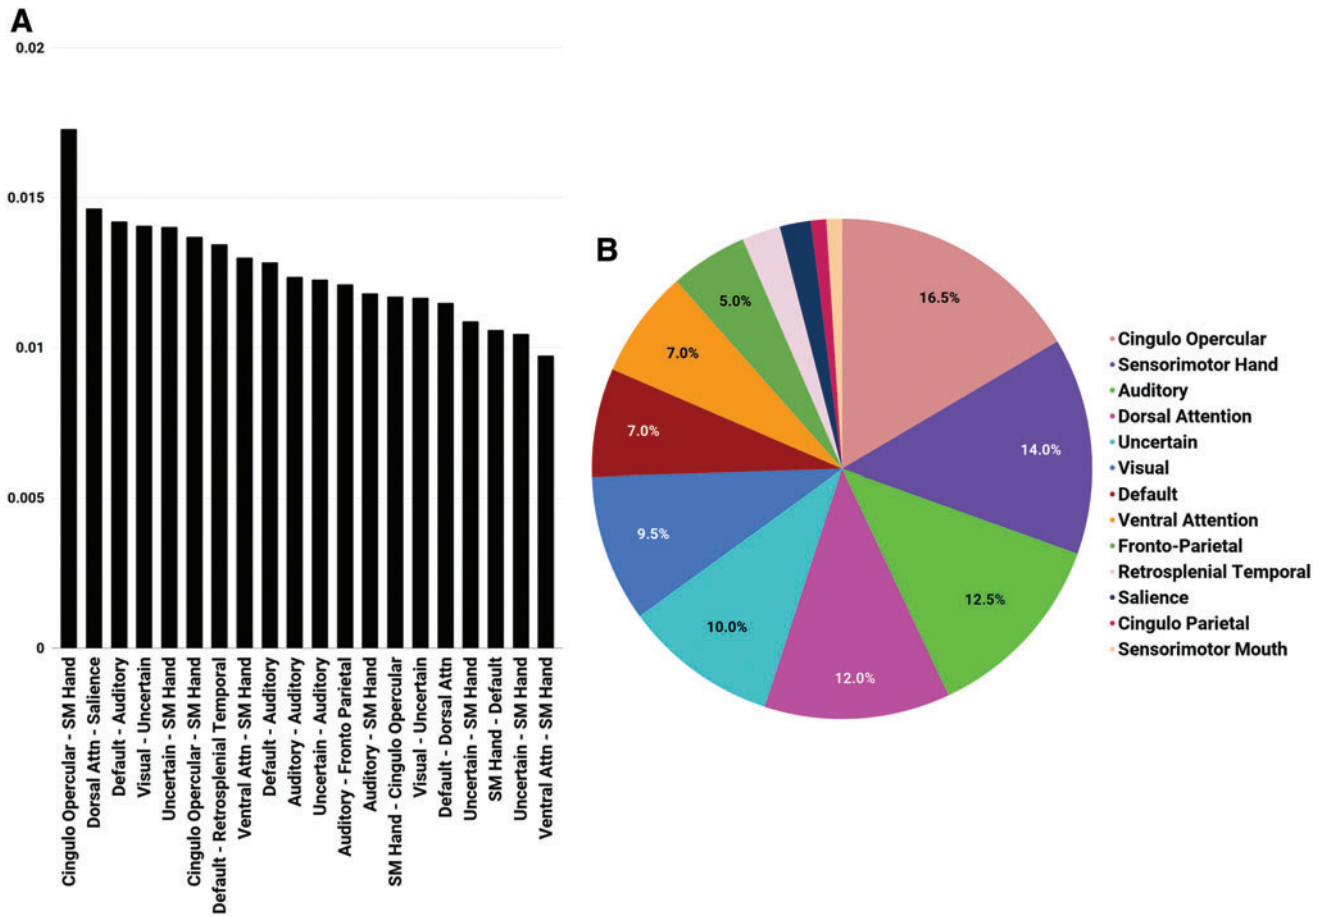

**SUPPLEMENTARY FIG. S6.** (A) Most informative fcMRI variables from analysis 3a, using Harvard-Oxford ROIs. For better visibility, only the top 20 variables are shown. (B) ROI participations of the top 100 fcMRI features from analysis 3a by network.

| # of Variables | Accuracy | Sensitivity | Specificity |
|----------------|----------|-------------|-------------|
| 1688           | 0.67     | 0.67        | 0.66        |
| 1152           | 0.67     | 0.72        | 0.62        |
| 790            | 0.77     | 0.76        | 0.79        |
| 568            | 0.78     | 0.78        | 0.79        |
| 415            | 0.82     | 0.83        | 0.81        |
| 330            | 0.82     | 0.80        | 0.83        |
| 264            | 0.81     | 0.78        | 0.83        |
| 211            | 0.81     | 0.76        | 0.85        |
| 169            | 0.78     | 0.74        | 0.83        |
| 135            | 0.81     | 0.80        | 0.81        |
| 108            | 0.82     | 0.80        | 0.83        |
| 86             | 0.82     | 0.78        | 0.85        |
| 69             | 0.80     | 0.74        | 0.85        |
| 55             | 0.78     | 0.70        | 0.87        |
| 44             | 0.80     | 0.74        | 0.85        |
| 35             | 0.81     | 0.74        | 0.87        |
| 28             | 0.81     | 0.72        | 0.89        |
| 22             | 0.83     | 0.80        | 0.85        |
| 18             | 0.83     | 0.80        | 0.85        |
| 14             | 0.82     | 0.78        | 0.85        |
| 11             | 0.81     | 0.78        | 0.83        |
| 9              | 0.82     | 0.80        | 0.83        |
| 7              | 0.84     | 0.83        | 0.85        |
| 6              | 0.77     | 0.76        | 0.79        |
| 5              | 0.77     | 0.76        | 0.79        |
| 4              | 0.76     | 0.70        | 0.83        |
| 3              | 0.71     | 0.63        | 0.79        |

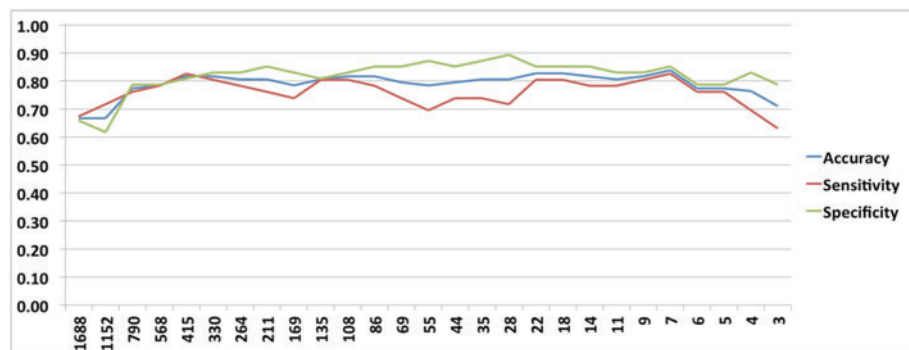

**SUPPLEMENTARY FIG. S7.** Accuracy, sensitivity, and specificity rates for each CRF dimension reduction in analysis 3b, using fcMRI variables based on Harvard-Oxford ROIs. The highlighted blue row shows the number of variables with the highest accuracy.
